# Supplementary material
Source: publisher site journal article supplement (https://www.dovepress.com/article/311718)
Supplement: Supplementary file 1 [file get_supplementary_file.php]

**Supporting information**

Effective oxidation-responsive polyester nanocarriers for anti-inflammatory drug delivery

Pan He1*, Bingtong Tang1, Yusheng Li1, Yu Zhang2, Xinming Liu2, Xin Guo1, Dong Wang3, Peng She3, 4*, and Chunsheng Xiao2

1School of Materials Science and Engineering, Changchun University of Science and Technology, Changchun 130022, P. R. China

2Key Laboratory of Polymer Ecomaterials, Changchun Institute of Applied Chemistry, Chinese Academy of Sciences, Changchun 130022, P. R. China

3Department of Orthopaedics, The Seventh Affiliated Hospital of Sun Yat-sen University, Shenzhen 518107, P. R. China

4Joint Surgery Department, The First Hospital, Jilin University, Changchun 130021, P. R. China





**Fig. S1** Synthesis of mPEG-*b*-P(PA-*alt*-GPBAe) by combing ring-opening alternating copolymerization and click reaction.


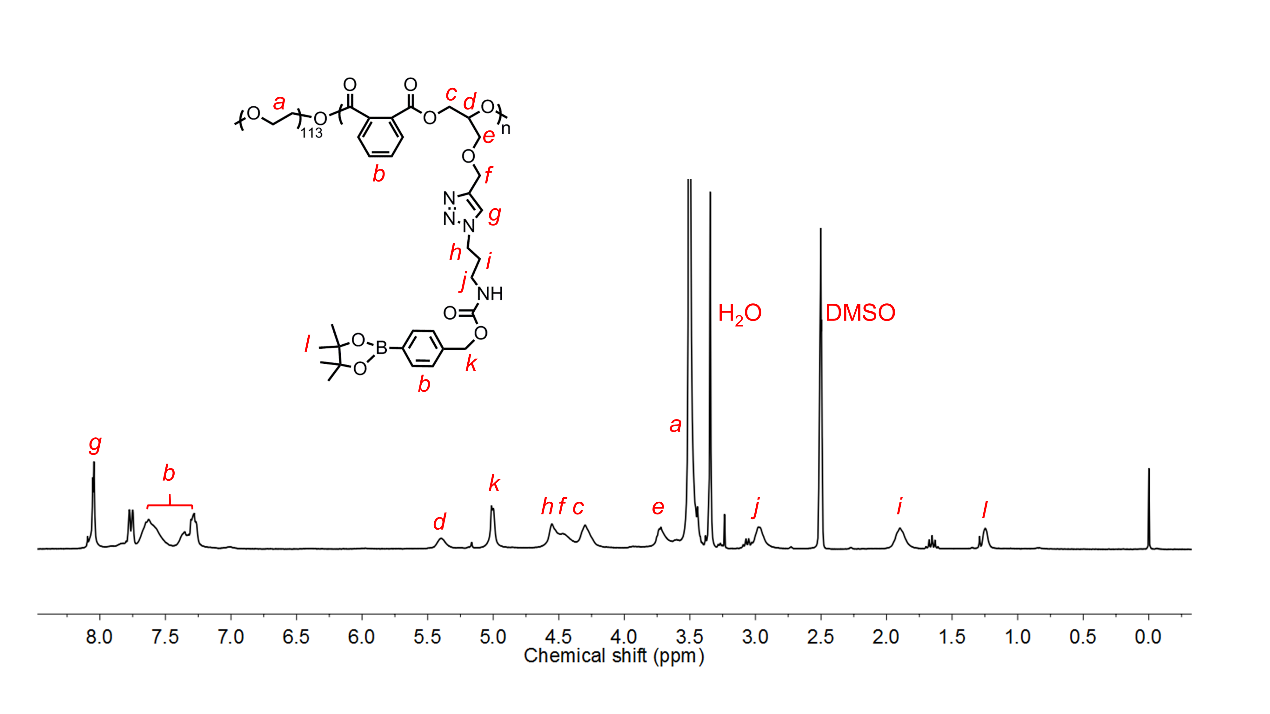


**Fig. S2** 1H NMR spectrum of mPEG-*b*-P(PA-*alt*-GPBAe) in DMSO-*d*6.


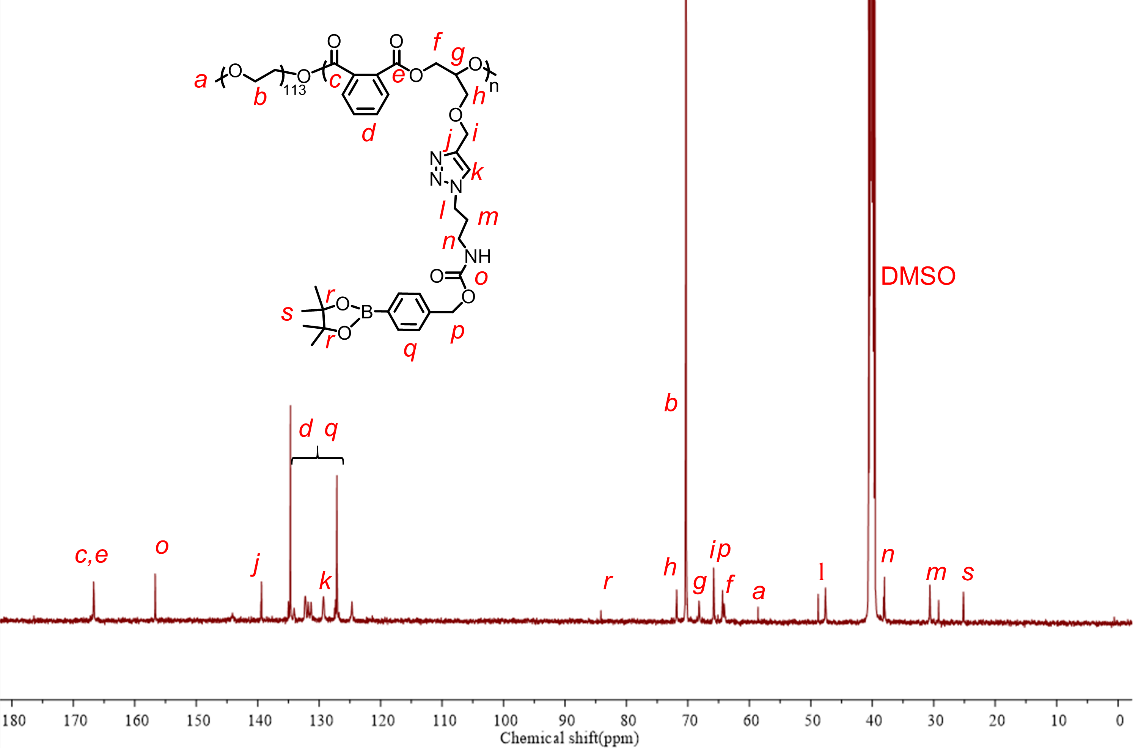


**Fig. S3** 13C NMR spectrum of mPEG-*b*-P(PA-*alt*-GPBAe) in DMSO-*d*6.


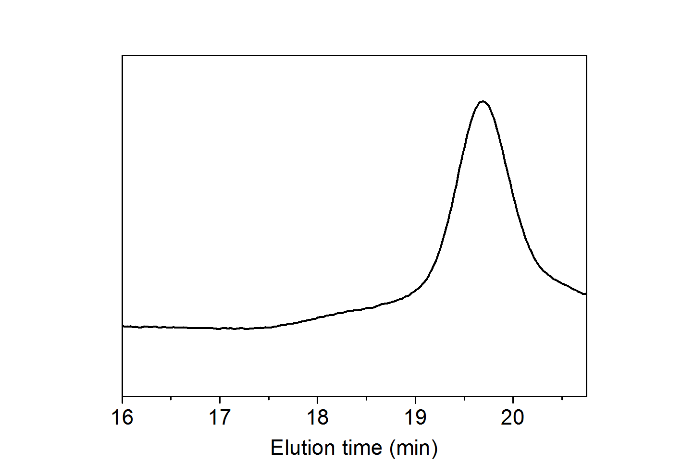


**Fig. S4** Gel permeation chromatography (GPC) profile of mPEG-*b*-P(PA-*alt*-GPBAe). GPC measurement was carried out using a Waters instrument (515 HPLC pump) equipped with a Waytt interferometric refractometer. SEC columns were eluted with chloroform or Dimethyl Formamide at 25 °C at 1 mL min-1. The molecular weights were calibrated against a series of polystyrene standards.


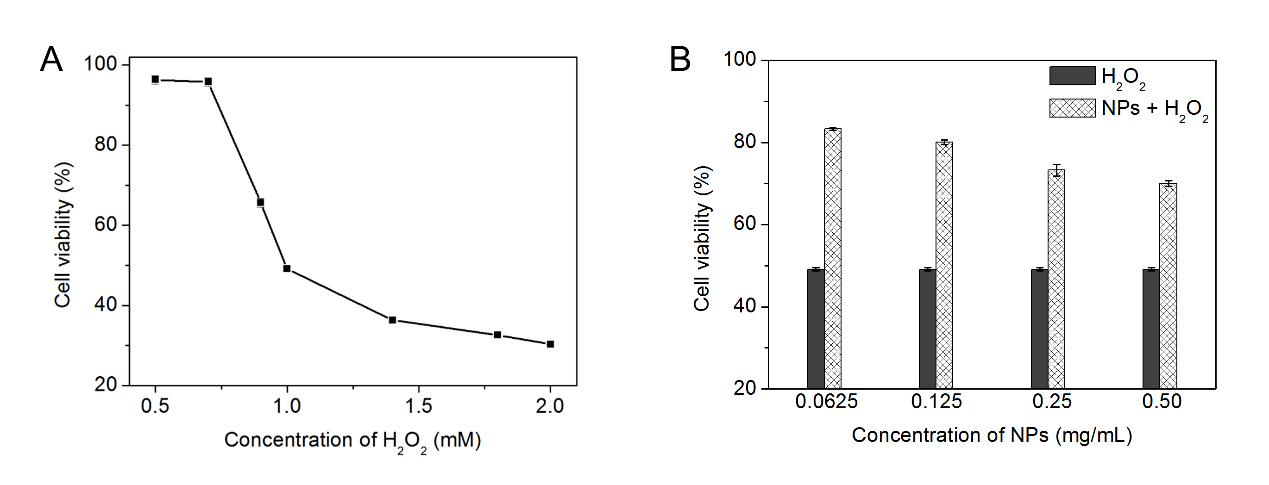


**Fig. S5** Cytotoxicity assay: mPEG-*b*-P(PA-*alt*-GPBAe) NPs scavenge ROS to protect RAW 264.7 cells from exogenous ROS-induced oxidative damage. (A) Effect of exogenous H2O2 on the cell viability; (B) Protective effect of NPs against H2O2-induced oxidative damage to cells. The concentration of H2O2 was 1.0 mM.

The experimental protocol for **Fig. S5:**

RAW 264.7 cells were cultured in a complete Dulbecco’s modified Eagle’s medium (DMEM, GIBCO) medium containing 10% (V/V) inactivated fetal bovine serum, streptomycin (50 U mL-1) and penicillin (50 U mL-1) under 5% CO2 at 37 ° C. Cells in 180.0 μL DMEM were seeded into each well of 96-well-plate with a density of 1.0×104/ well and incubated overnight. Different concentrations of H2O2 (0.5 to 2.0 mM) were added and incubated for 4 h. Then, 20.0 μL MTT stock solution (5 mg mL-1) was added into each well and cultured for another 4 h. The supernatant of each well was discarded and replaced with 150 μL DMSO. After shaking for 10 minutes, the absorbance at 490 nm (*A*490) of the above solution was measured on a Bio-Rad 680 microplate reader (USA). Cell viability (%) = (*A*sample/*A*control) × 100%, where *A*sample and *A*control are the *A*490 of the sample and control (PBS) wells, respectively.

To evaluate the protection effect of mPEG-*b*-P(PA-*alt*-GPBAe) NPs for RAW 264.7 cells from exogenous ROS, the supernatant of cell seeded 96-well-plate was replaced with medium containing different concentrations of NPs. After 1 h, H2O2 at a dose of 1.0 mM was added to each well and incubated for another 4 h. The cell viabilities were determined by MTT assay.
